# Supplementary material for: Malaria morbidity and mortality following introduction of a universal policy of artemisinin-based treatment for malaria in Papua, Indonesia: A longitudinal surveillance study
Source: PLoS Med. 2019 May 29;16(5):e1002815. doi: 10.1371/journal.pmed.1002815 (PMC6541239; doi:10.1371/journal.pmed.1002815)
Supplement: S1 Data — (XLSX) [file pmed.1002815.s005.xlsx]

## Sheet: Entomology
Period	Year	Month	BPYtot	BPYFart	BPYkolt	BPYpunt	mannight	manhours
1	2004	4	57.571	11.5142	44.9054	1.15142	317	3170
1	2004	5	97.6761	20.5634	76.2559	0.856808	426	4260
1	2004	6	153.97	19.9256	129.516	4.52854	403	4030
1	2004	7	115.263	12.133	102.119	1.01108	361	3610
1	2004	8	167.92	98.5399	64.3526	5.02755	363	3630
1	2004	9	114.133	22.6006	84.7523	6.78019	323	3230
1	2004	10	64.213	10.1389	38.8657	15.2083	216	2160
1	2004	11	71.8194	1.96765	58.0458	11.8059	371	3710
1	2004	12	50.3448	4.1954	40.5556	5.59387	261	2610
1	2005	1	163.41	3.05439	154.247	6.10879	239	2390
1	2005	2	28.1974	1.56652	23.4979	3.13305	233	2330
1	2005	3	93.7015	7.62687	79.5373	6.53731	335	3350
1	2005	4	111.612	9.04959	88.9876	13.5744	242	2420
1	2005	5	96.5198	7.76596	84.3161	4.43769	329	3290
1	2005	6	89.4466	8.65613	76.4625	4.32806	253	2530
1	2005	7	161.777	30.7509	128.352	2.67399	273	2730
1	2005	8	136.752	19.6765	106.253	11.8059	371	3710
1	2005	9	183.634	12.4689	166.63	2.26708	322	3220
1	2005	10	125.695	10.8775	106.358	8.46026	302	3020
1	2005	11	178.617	15.5319	160.496	2.58865	282	2820
1	2005	12	145.711	11.5415	128.399	5.77075	253	2530
1	2006	1	320.589	38.8593	280.342	1.38783	263	2672
1	2006	2	117.923	7.48718	110.436	0	195	1950
1	2006	3	61.7279	5.36765	56.3603	0	136	1360
2	2006	4	115.912	1.23311	113.446	1.23311	296	2960
2	2006	5	75.7749	2.1345	73.6404	0	342	3420
2	2006	6	115.155	4.11268	107.958	3.08451	355	3550
2	2006	7	126.308	7.9564	112.384	5.9673	367	3670
2	2006	8	217.853	61.1518	150.969	5.73298	191	1910
2	2006	9	120.201	19.0562	92.3494	8.79518	249	2552
2	2006	10	217.55	16.9205	193.377	7.25166	302	3020
2	2006	11	131.25	12.5	117.5	1.25	292	2920
2	2006	12	156.872	12.4255	142.894	1.55319	235	2350
2	2007	1	533.933	35.012	482.29	16.6307	417	4170
2	2007	2	450.504	12.8715	422.003	15.6297	397	3970
2	2007	3	273.75	22.2736	224.892	26.5846	508	5080
2	2007	4	357.608	24.0253	305.861	27.7215	395	3950
2	2007	5	282.915	23.9083	255.819	3.18777	458	4580
2	2007	6	209.142	7.9927	199.818	1.33212	274	2740
2	2007	7	236.239	28.7318	187.289	20.2187	343	3430
2	2007	8	200.706	47.9562	149.197	3.55231	411	4110
2	2007	9	137.604	29.1534	106.118	2.33227	313	3132
2	2007	10	90.0649	11.8506	75.8442	2.37013	308	3080
2	2007	11	48.5836	13.7031	29.8976	4.98294	293	2930
2	2007	12	33.5348	1.76499	31.7698	0	206.8	2068
2	2008	1	107.472	28.3889	79.0833	0	360	3600
2	2008	2	44.4875	6.06648	38.4211	0	361	3610
2	2008	3	100.837	17.0428	83.7938	0	257	2570
3	2008	4	65.5859	5.70312	59.8828	0	256	2560
3	2008	5	36.962	4.62025	32.3418	0	237	2370
3	2008	6	91.25	19.5536	70.067	1.62946	224	2240
3	2008	7	157.293	29.2403	128.052	0	362	3620
3	2008	8	84.5134	30.6208	51.443	2.44966	298	2980
3	2008	9	79.2349	31.1744	48.0605	0	281	2810
3	2008	10	36.5	7.3	26.28	2.92	250	2502
3	2008	11	87.7132	26.8798	60.8333	0	258	2580
3	2008	12	110.349	4.24419	106.105	0	258	2580
3	2009	1	178.321	20.8969	157.424	0	262	2620
3	2009	2	241.854	17.7508	224.103	0	329	3290
3	2009	3	169.841	9.49422	160.347	0	346	3460
3	2009	4	164.357	17.076	147.281	0	342	3420
3	2009	5	168.812	10.2656	157.406	1.14062	320	3200
3	2009	6	193.715	12.4612	181.254	0	322.2	3222

## Sheet: Rainfall
Period	Year	Month	Rainfall
1	2004	4	15.8238
1	2004	5	22.7699
1	2004	6	9.982
1	2004	7	11.7741
1	2004	8	15.6331
1	2004	9	22.9865
1	2004	10	13.6665
1	2004	11	18.923
1	2004	12	24.6074
1	2005	1	18.0096
1	2005	2	22.4605
1	2005	3	22.5979
1	2005	4	31.1571
1	2005	5	25.335
1	2005	6	31.2638
1	2005	7	47.4839
1	2005	8	29.2581
1	2005	9	39.62
1	2005	10	20.3097
1	2005	11	22.5267
1	2005	12	21.7355
1	2006	1	19.3097
1	2006	2	26.6643
1	2006	3	18.8323
2	2006	4	23.7933
2	2006	5	25.7097
2	2006	6	30.8733
2	2006	7	31.4258
2	2006	8	27.3419
2	2006	9	30.32
2	2006	10	14.8839
2	2006	11	22.36
2	2006	12	27.8194
2	2007	1	32.929
2	2007	2	21.7357
2	2007	3	23.4581
2	2007	4	35.7533
2	2007	5	33.9032
2	2007	6	50.3333
2	2007	7	26.0774
2	2007	8	52.8645
2	2007	9	27.9333
2	2007	10	25.0968
2	2007	11	31.98
2	2007	12	22.6065
2	2008	1	15.3806
2	2008	2	27.5931
2	2008	3	35.2839
3	2008	4	28.02
3	2008	5	29.7742
3	2008	6	43.0333
3	2008	7	57.8645
3	2008	8	47.6903
3	2008	9	25.78
3	2008	10	31.3677
3	2008	11	25.5733
3	2008	12	33
3	2009	1	19.0435
3	2009	2	26.5571
3	2009	3	38.7355
3	2009	4	29.5867
3	2009	5	25.8839
3	2009	6	37.0667
3	2009	7	16.4065
