# Supplementary material for: Malaria morbidity and mortality following introduction of a universal policy of artemisinin-based treatment for malaria in Papua, Indonesia: A longitudinal surveillance study
Source: PLoS Med. 2019 May 29;16(5):e1002815. doi: 10.1371/journal.pmed.1002815 (PMC6541239; doi:10.1371/journal.pmed.1002815)
Supplement: S4 Data — RSMM, Rumah Sakit Mitra Masyarakat; RSUD, Rumah Sakit Umum Daerah. (XLSX) [file pmed.1002815.s008.xlsx]

## Sheet: Combined
	Pre policy change	Early transition period	Late transition period	Post transition	Totals
Hospital and Community Data	Apr 2004 - Mar 2006	Apr 2006 - Mar 2008	Apr 2008 - Dec 2009	Jan 2010 - Dec 2013
Estimated mean population for period	120457	143723	148124	189447
Months	24	24	21	48	117
Days	729	730	639	1460	3558
Person years observation	240914	287446	259217	757788
% of patients with malaria attending surveillance centre	0.457		0.673
Absolute Numbers
P. falciparum
Community	37304	35864	25362	Unknown	98530
RSMM OP	13654	18977	14801	35259	82691
RSMM IP	5311	4863	2890	4323	17387
RSUD OP	0	0	411	10047	10458
RSUD IP	0	0	0	4120	4120
	56269	59704	43464	53749	213186
P. vivax
Community	28872	29899	28861	Unknown	87632
RSMM OP	6056	9472	11198	32464	59190
RSMM IP	1489	1383	1199	2045	6116
RSUD OP	0	0	401	9571	9972
RSUD IP	0	0	0	2411	2411
	36417	40754	41659	46491	165321
Mixed
Community	1572	1451	1073	Unknown	4096
RSMM OP	906	2248	2066	16614	21834
RSMM IP	874	720	572	1779	3945
RSUD OP	0	0	8	926	934
RSUD IP	0	0	0	196	196
	3352	4419	3719	19515	31005
P. malariae
Community	1350	1129	829	Unknown	3308
RSMM OP	411	871	1230	2153	4665
RSMM IP	70	105	122	135	432
RSUD OP	0	0	12	144	156
RSUD IP	0	0	0	45	45
	1831	2105	2193	2477	8606
P. ovale
Community	0	0	0	Unknown	0
RSMM OP	17	25	36	32	110
RSMM IP	1	3	3	3	10
RSUD OP	0	0	0	0	0
RSUD IP	0	0	0	0	0
	18	28	39	35	120
Totals
Community	69098	68343	56125	Unknown	193566
RSMM OP	21044	31593	29331	86522	168490
RSMM IP	7745	7074	4786	8285	27890
RSUD OP	0	0	832	20688	21520
RSUD IP	0	0	0	6772	6772
	97887	107010	91074	122267	418238
Derived Parameters
Percentage of malaria due to P. vivax (alone or mixed)	0.406275	0.422138	0.498254	0.539851
Estimated incidence rate per 1000 person years				Percent Reduction in Incidence
With Shift in Treatment Seeking Behaviour
Overall	889.092		522.055	0.412823
Pf	511.082		249.144	0.512516
Pv	330.77		238.798	0.278055
Mixed Infections	30.4457		21.3181	0.2998
Pm	16.6307		12.5707	0.244125
Assuming No Shift in Treatment Seeking
Overall	406.315	372.279	351.343	0.135295
Pf	233.565	207.705	167.674	0.282108
Pv	151.162	141.78	160.711	-0.0631713
Mixed Infections	13.9137	15.3733	14.3471	-0.0311473
Pm	7.60022	7.32311	8.46009	-0.113138
